# Supplementary material for: Sex differences in sudden cardiac death in a nationwide study of 54 028 deaths
Source: HighWire-hosted journal article supplement (doi:10.1136/heartjnl-2021-320300), 2022-03-11
Supplement: heartjnl-2021-320300supp001_data_supplement.pdf [file heartjnl-2021-320300supp001_data_supplement.pdf]

## Incidence of SCD according to sex and age group

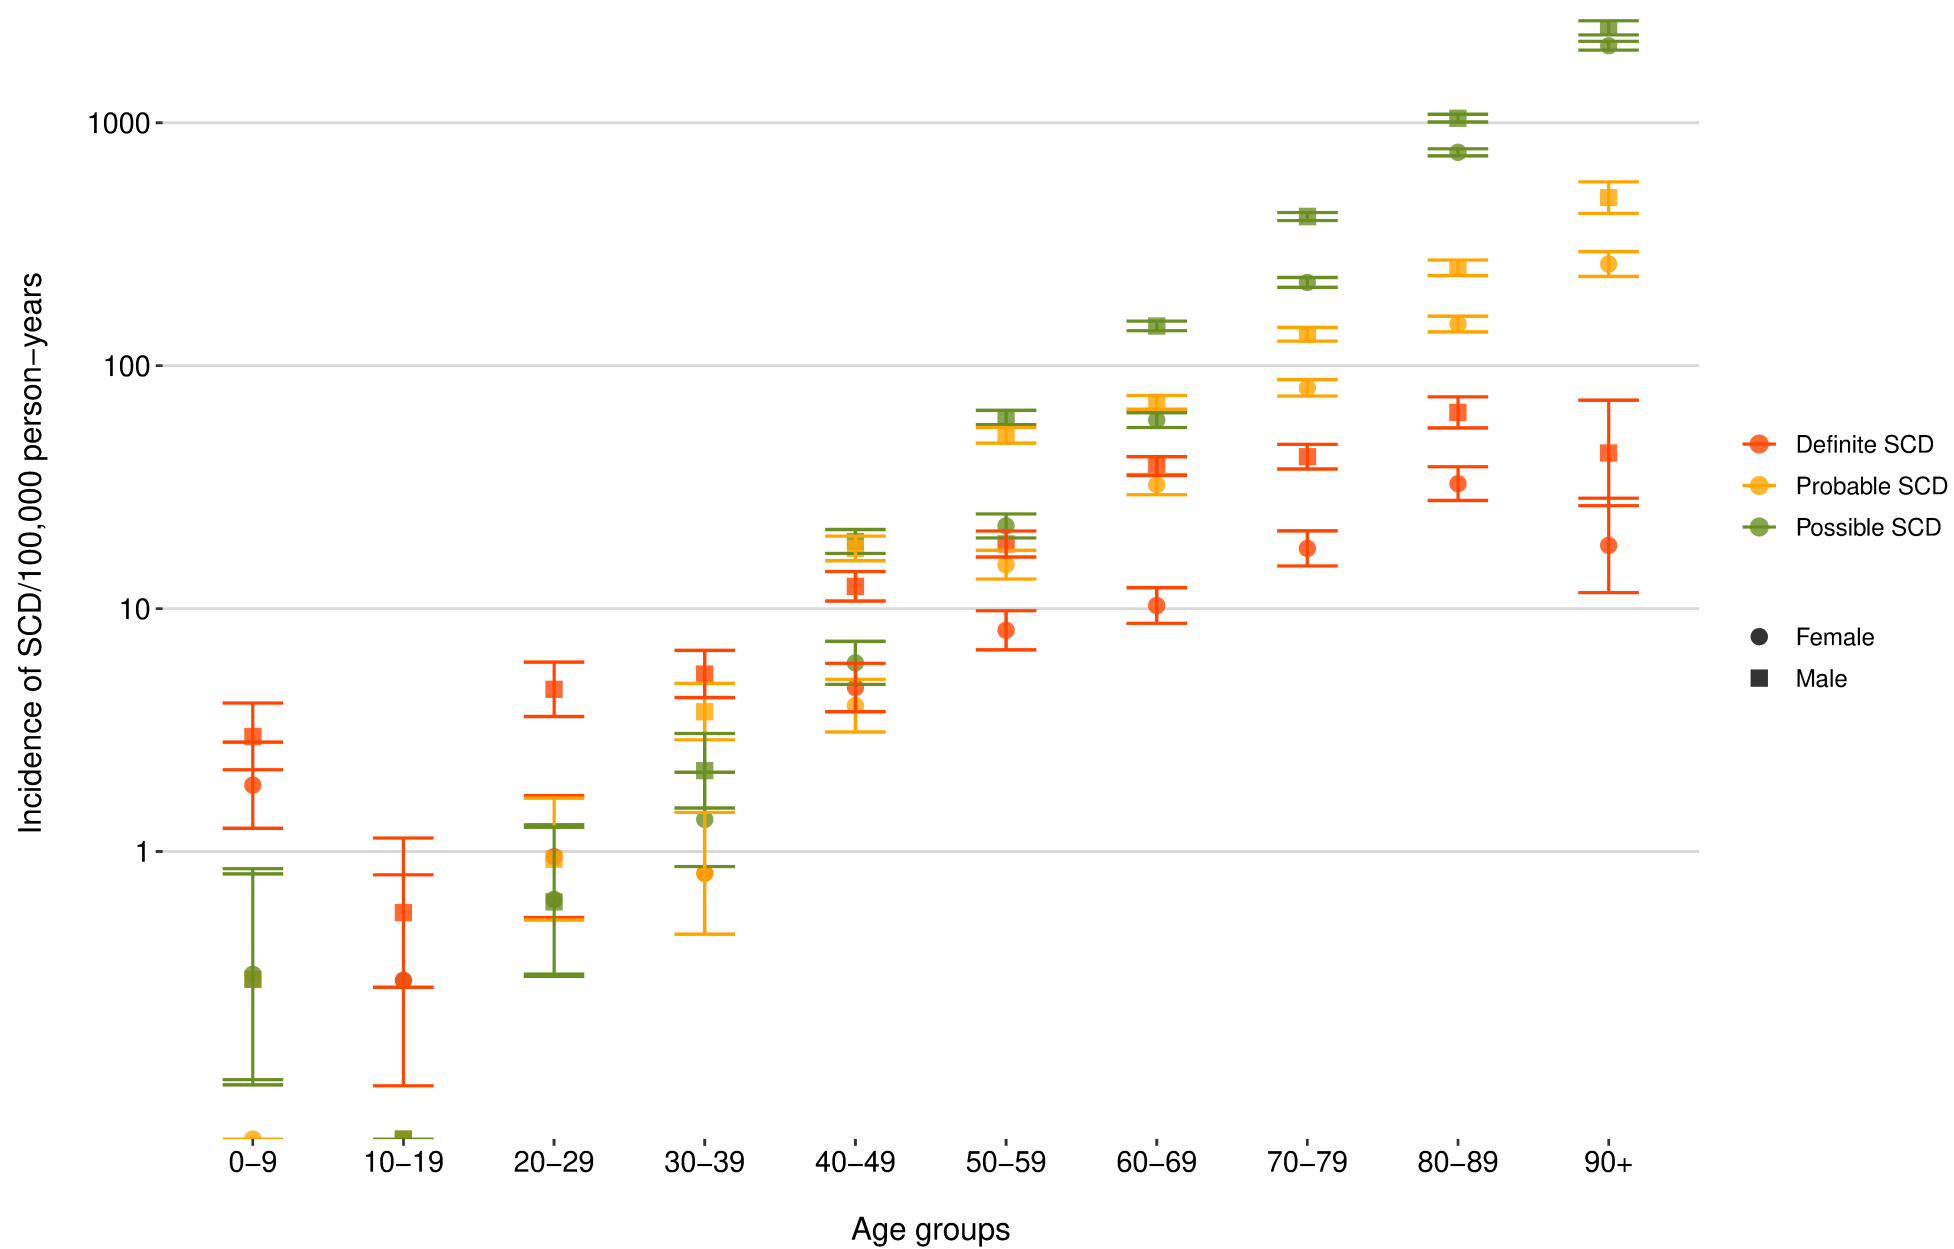

Error bars indicate 95 % CI. The scale of the Y-axis is logarithmic
